# Supplementary material for: In vivo priming of human mesenchymal stem cells with hepatocyte growth factor–engineered mesenchymal stem cells promotes therapeutic potential for cardiac repair
Source: PubMed Central journal article supplement — Sci Adv. 2020 Mar 25;6(13):eaay6994. doi: 10.1126/sciadv.aay6994 (PMC7141892; doi:10.1126/sciadv.aay6994), 2020-03-25
Supplement: aay6994_SM.pdf [file aay6994_SM.pdf]

## Supplementary Materials for

### **In vivo priming of human mesenchymal stem cells with hepatocyte growth factor–engineered mesenchymal stem cells promotes therapeutic potential for cardiac repair**

Bong-Woo Park, Soo-Hyun Jung, Sanskrita Das, Soon Min Lee, Jae-Hyun Park, Hyeok Kim, Ji-Won Hwang, Sunghun Lee, Hyo-Jin Kim, Hey-Yon Kim, Seungman Jung, Dong-Woo Cho, Jinah Jang\*, Kiwon Ban\*, Hun-Jun Park\*

\*Corresponding author. Email: jinahjang@postec.ac.kr (J.J.); kiwonban@cityu.edu.hk (K.B.); cardioman@catholic.ac.kr (H.-J.P.).

Published 25 March 2020, *Sci. Adv.* 6, eaay6994 (2020)  
DOI: 10.1126/sciadv.aay6994

#### **This PDF file includes:**

- Fig. S1. Characterization of HGF-eMSC.
- Fig. S2. Cellular characteristics of irradiated HGF-eMSC.
- Fig. S3. Cellular behavior of irradiated HGF-eMSC within the hdECM patch.
- Fig. S4. Investigation of the duration of priming effect in BM-MSC by HGF-eMSC.
- Fig. S5. Examination of the tumorigenicity of HGF-eMSCs.
- Fig. S6. Representative echo images of all experimental groups at 8 weeks after interventions.
- Fig. S7. Effects of nonirradiated HGF-eMSC for priming BM-MSCs and their therapeutic potential for MI.
- Fig. S8. Representative immunofluorescence staining images with cardiac-specific marker proteins.
- Fig. S9. Schematic illustration demonstrating the procedures for generating decellularized pig hdECM.
- Table S1. Primer sequences used for qRT-PCR analysis.

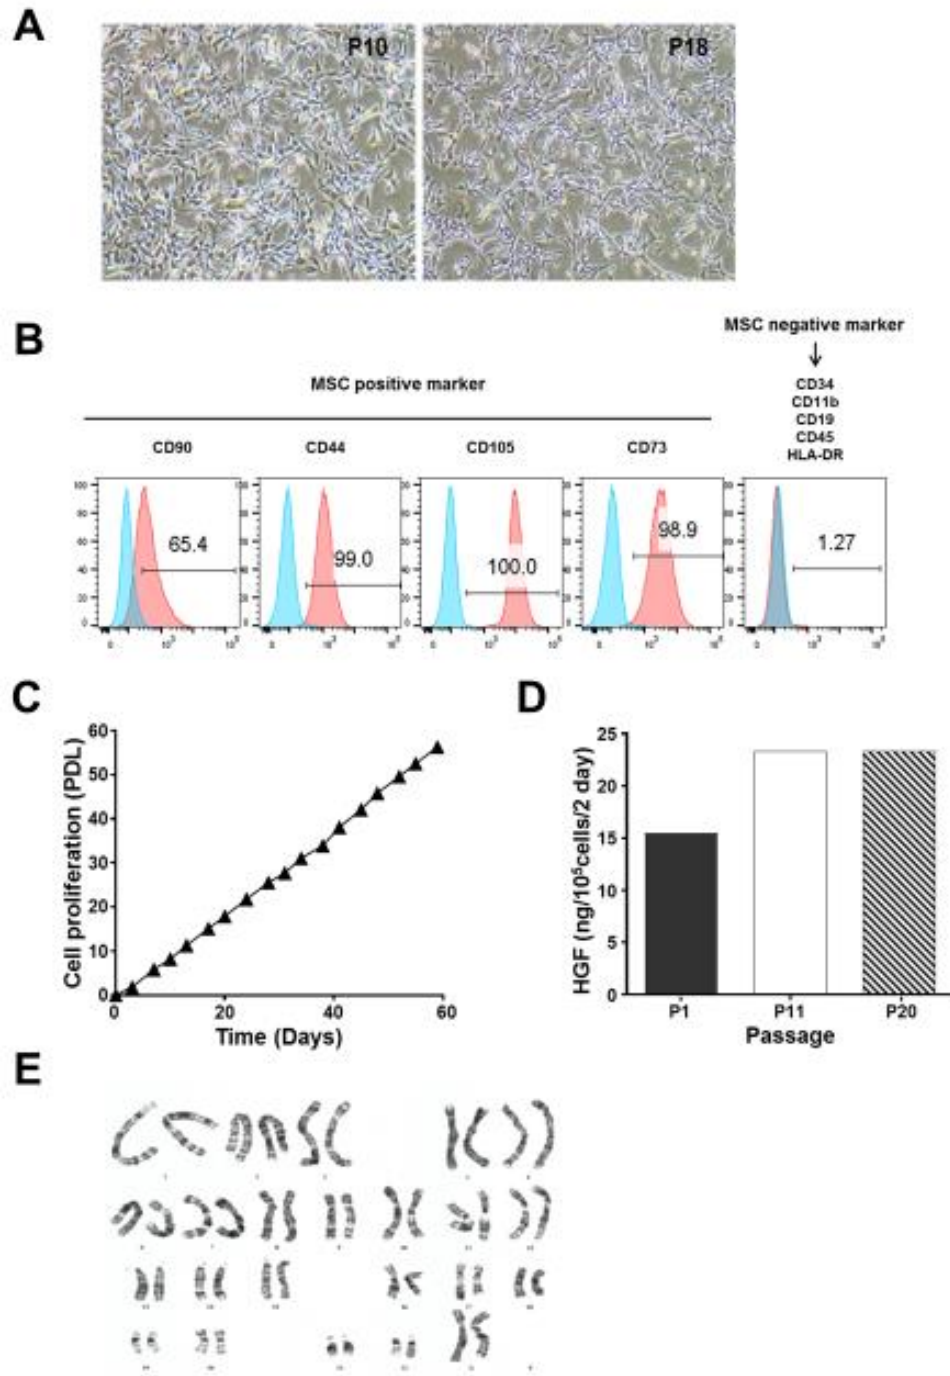

**Fig. S1. Characterization of HGF-eMSC.** (A) Morphology of human bone marrow derived MSCs. (B) Flow cytometry analyses show that HGF-eMSC express specific markers for MSCs such as CD90, CD44, CD105 and CD73. n=3 per group (C) Cell proliferation rate of HGF-eMSC. n=3 per group (D) HGF secretion of distinct passages of HGF-eMSC measured by ELISA. n=3 per group. (E) The results from karyotyping with HGF-MSCs. HGF-eMSC: Engineered hepatocyte growth factor expressing MSCs

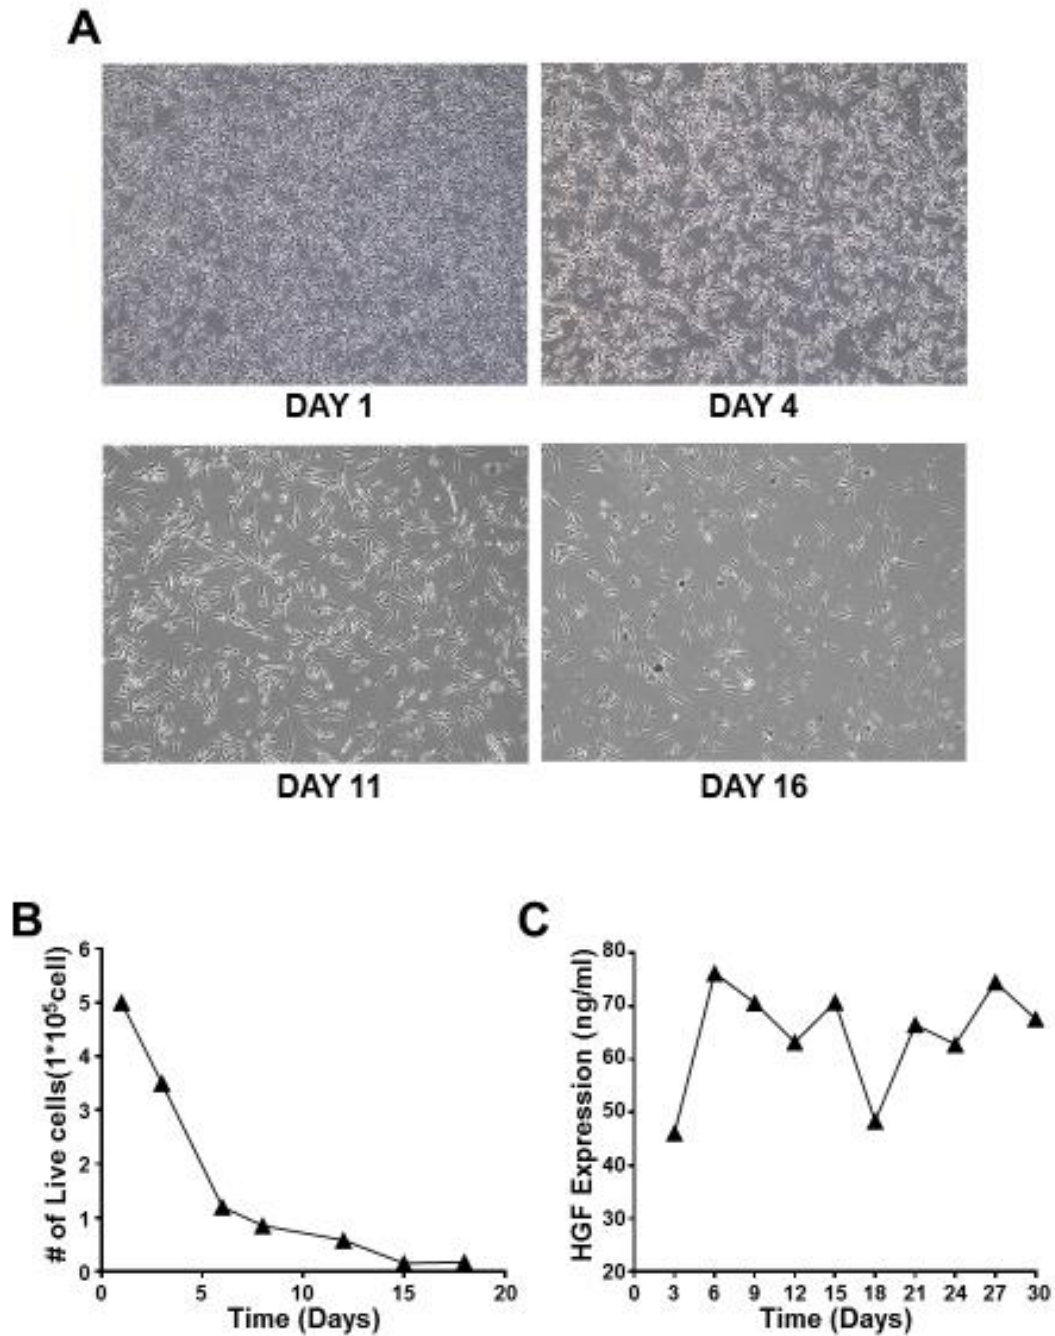

**Fig. S2. Cellular characteristics of irradiated HGF-eMSC.** (A) Morphology of irradiated HGF-eMSCs. (B) Cell proliferation rate of irradiated HGF-eMSC. n=3 per group. (C) HGF secretion of irradiated HGF-eMSC over times measured by ELISA. n=3 per group. HGF-eMSC: Engineered hepatocyte growth factor expressing MSCs.

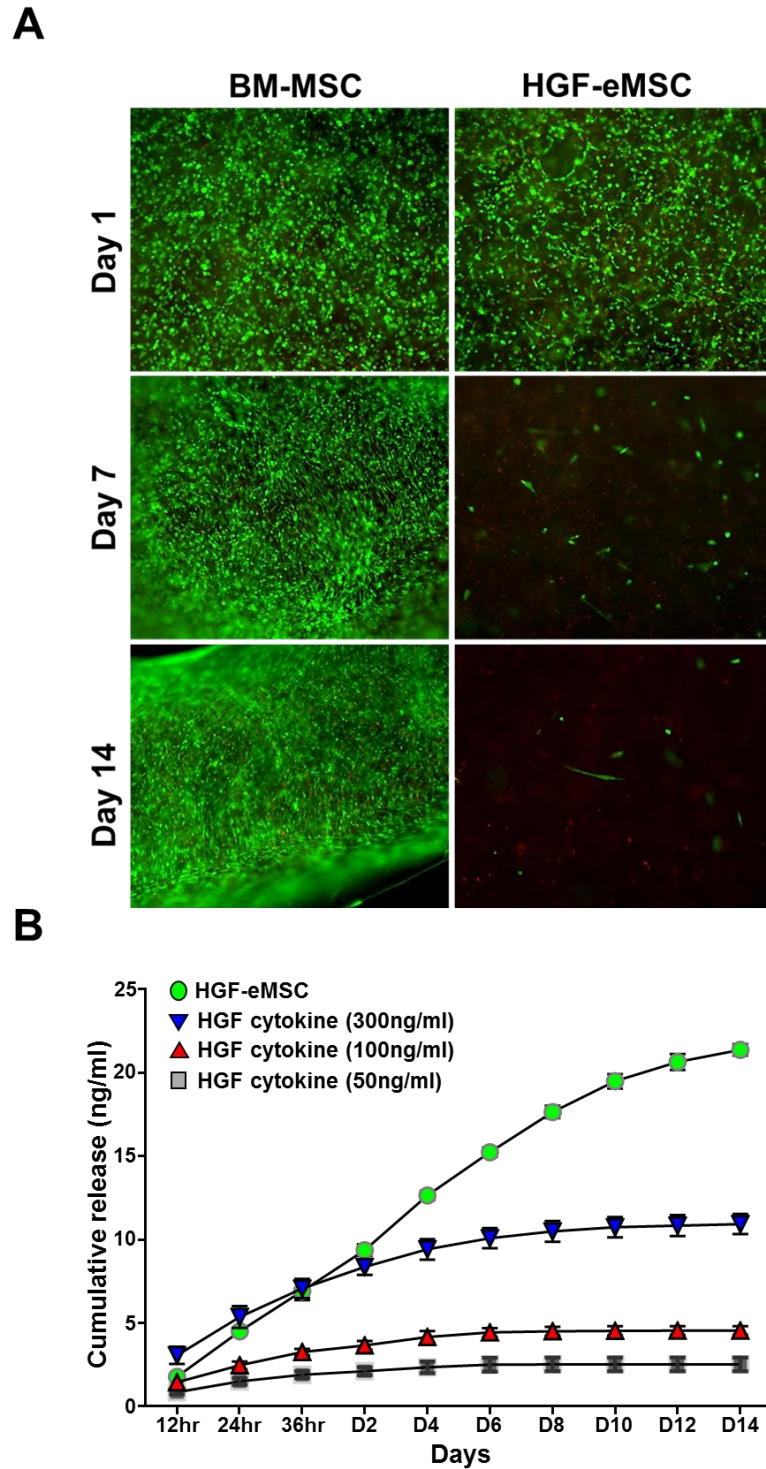

**Fig. S3. Cellular behavior of irradiated HGF-eMSC within the hdECM patch. (A)** The results from Live & Dead staining of HGF-eMSC within the hdECM patch indicating that irradiated HGF-eMSC are not remain viable within the the hdECM patch over time. **(B)** Cumulative release of HGF cytokine from irradiated HGF-eMSC encapsulated in hdECM.

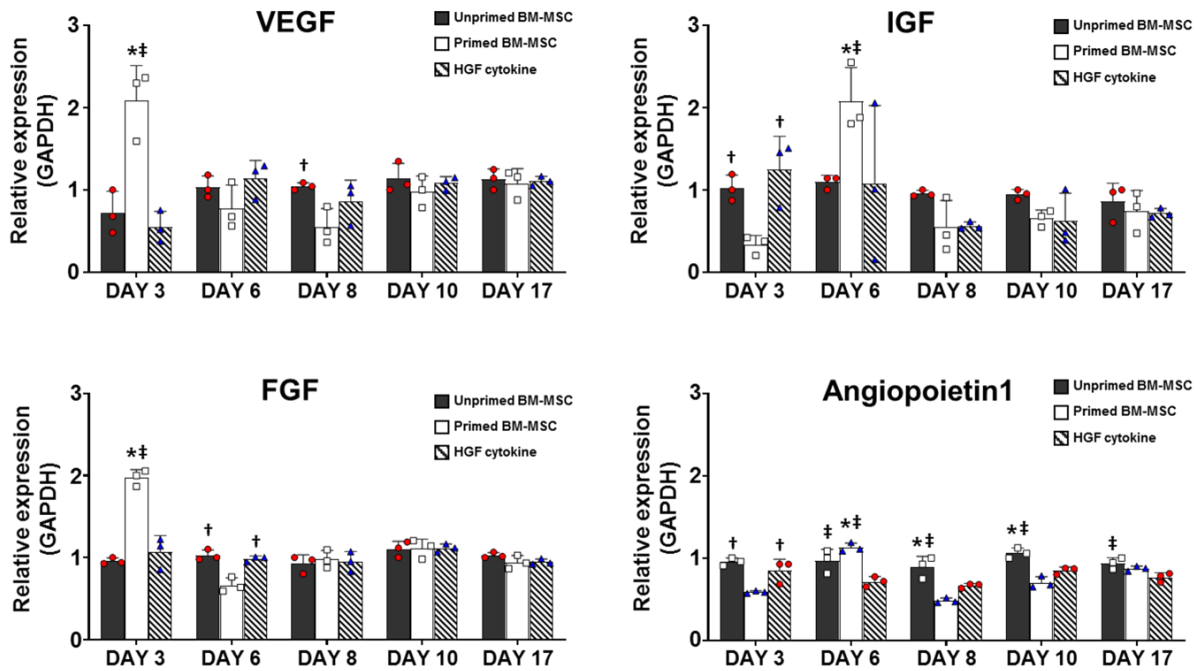

**Fig. S4. Investigation of the duration of priming effect in BM-MSC by HGF-eMSC.** To determine how long the effect of priming with HGF-eMSCs persists in BM-MSCs, the BM-MSCs and HGF-eMSCs were co-cultured for 3 days for priming purpose. After 3 days of co-culture, the BM-MSCs were continuously cultured and were harvested in different time points (day 3, 6, 8, 10 and 17). \* $p < 0.05$  compared to unprimed BM-MSC group, † $p < 0.05$  compared to primed BM-MSC group; ‡ $p < 0.05$  compared to HGF Cytokine primed BM-MSC group.

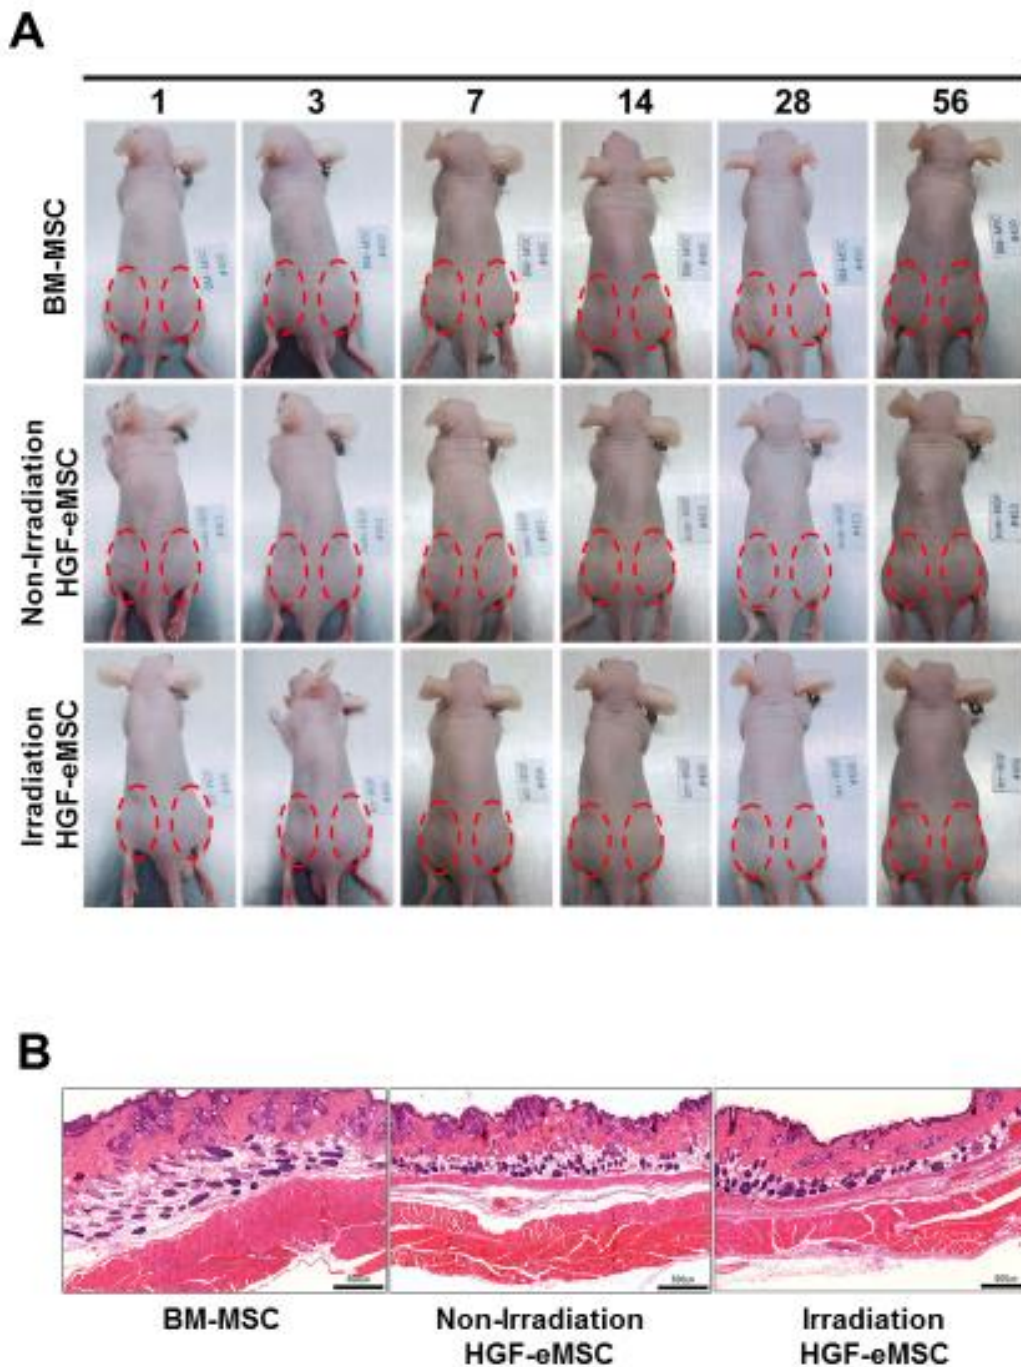

**Fig. S5. Examination of the tumorigenicity of HGF-eMSCs.** Subcutaneous implantation of different types of MSCs into the nude mice did not form the teratoma up to 56 days from their treatments. **(A)** Representative images of nude mice receiving different types MSCs ( $1 \times 10^6$  cells/100ul per red circle). **(B)** Representative images of Hematoxylin-and-eosin staining. Scale bars: 50 $\mu$ m.

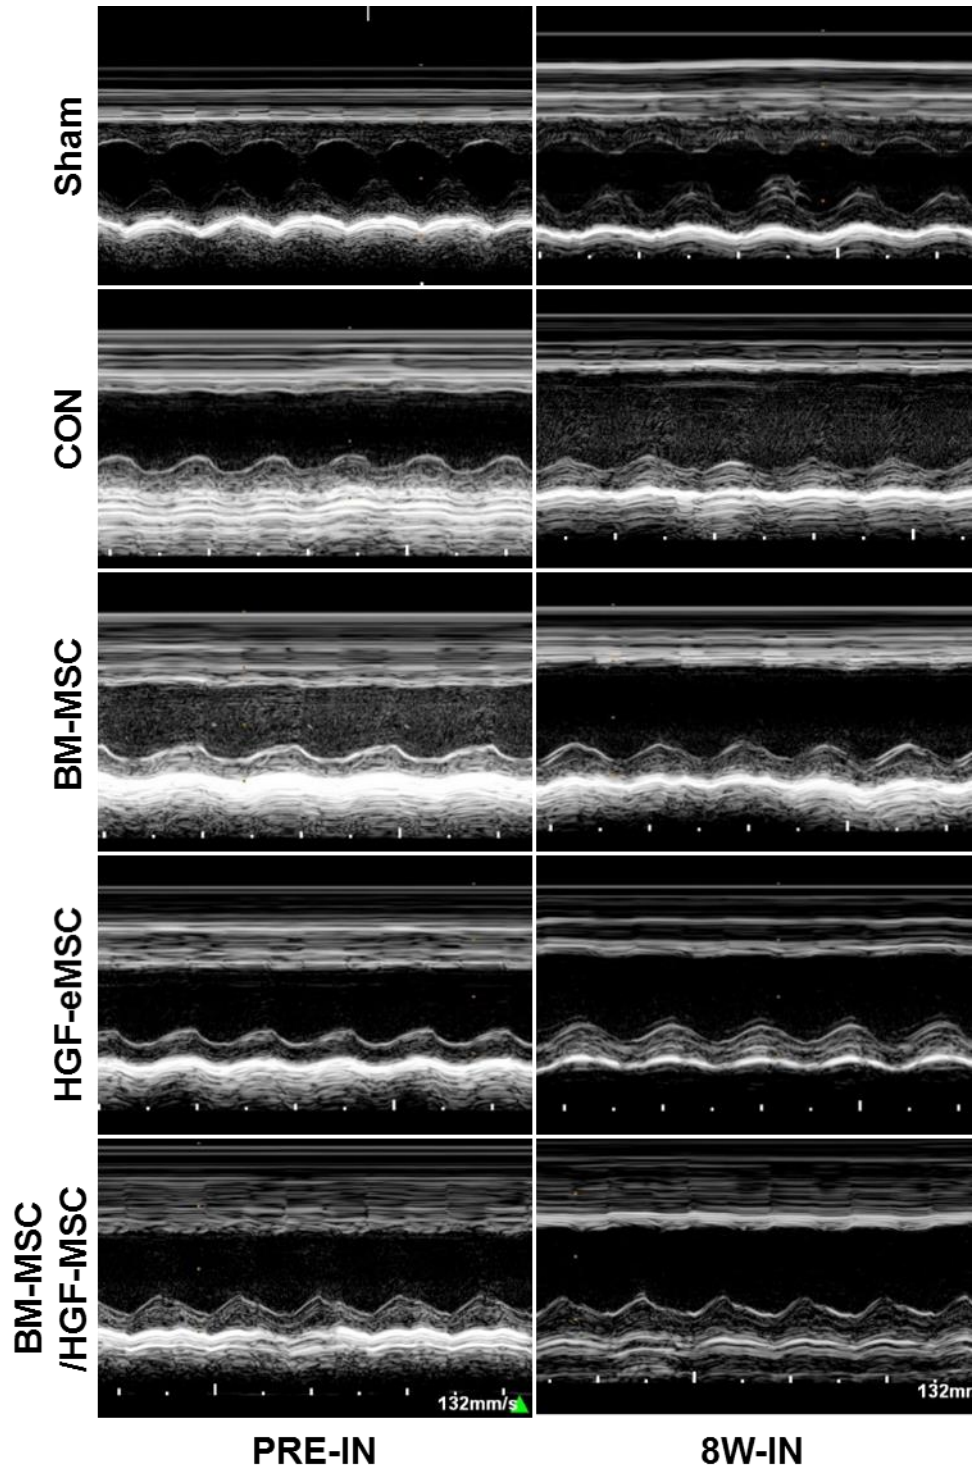

**Fig. S6. Representative echo images of all experimental groups at 8 weeks after interventions.**

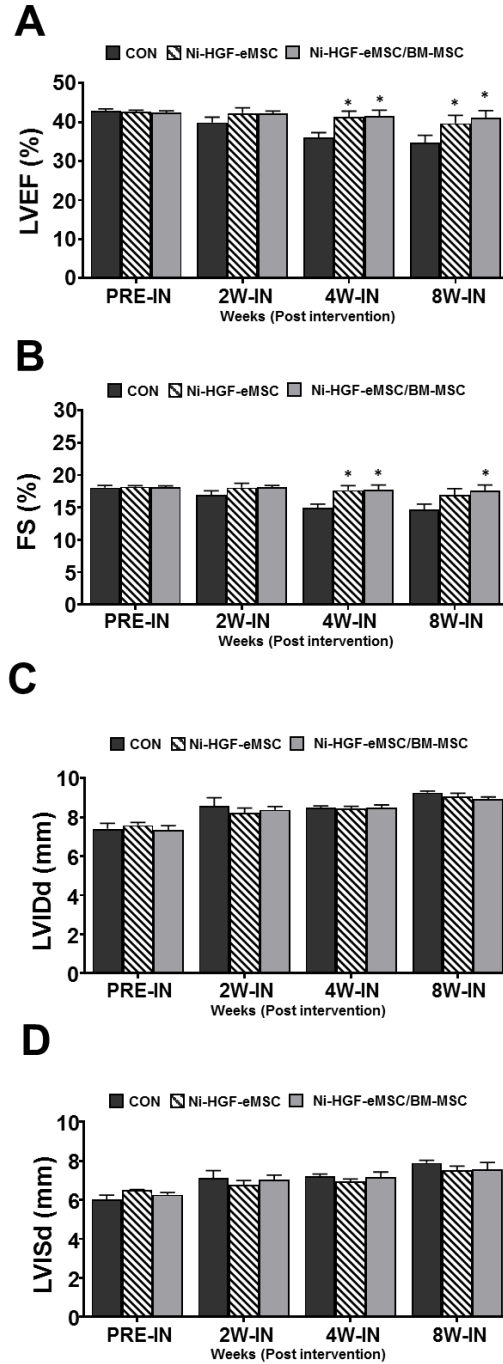

**Fig. S7. Effects of nonirradiated HGF-eMSC for priming BM-MSCs and their therapeutic potential for MI.** (A) Left ventricular ejection fraction (B) Fractional shorting (C) Left ventricular internal Diastolic dimension and (D) Left ventricular internal systolic dimension. \* $p < 0.05$  compared to Control group,  $n = 5$  per each group.



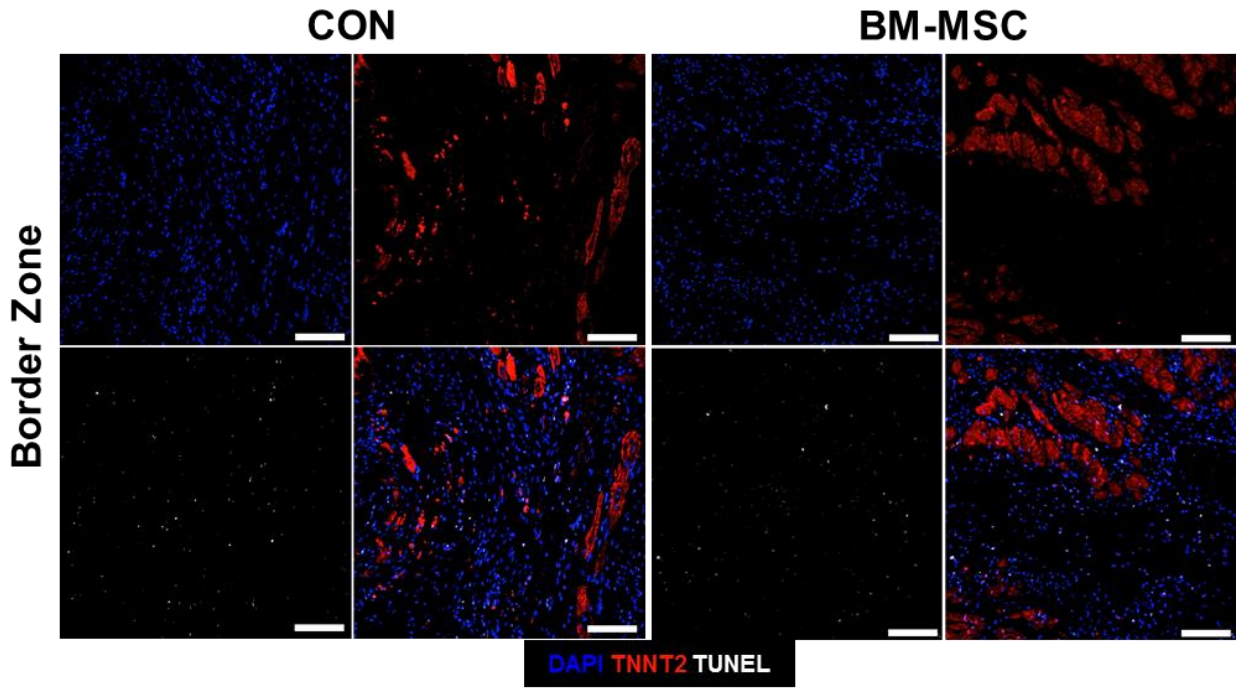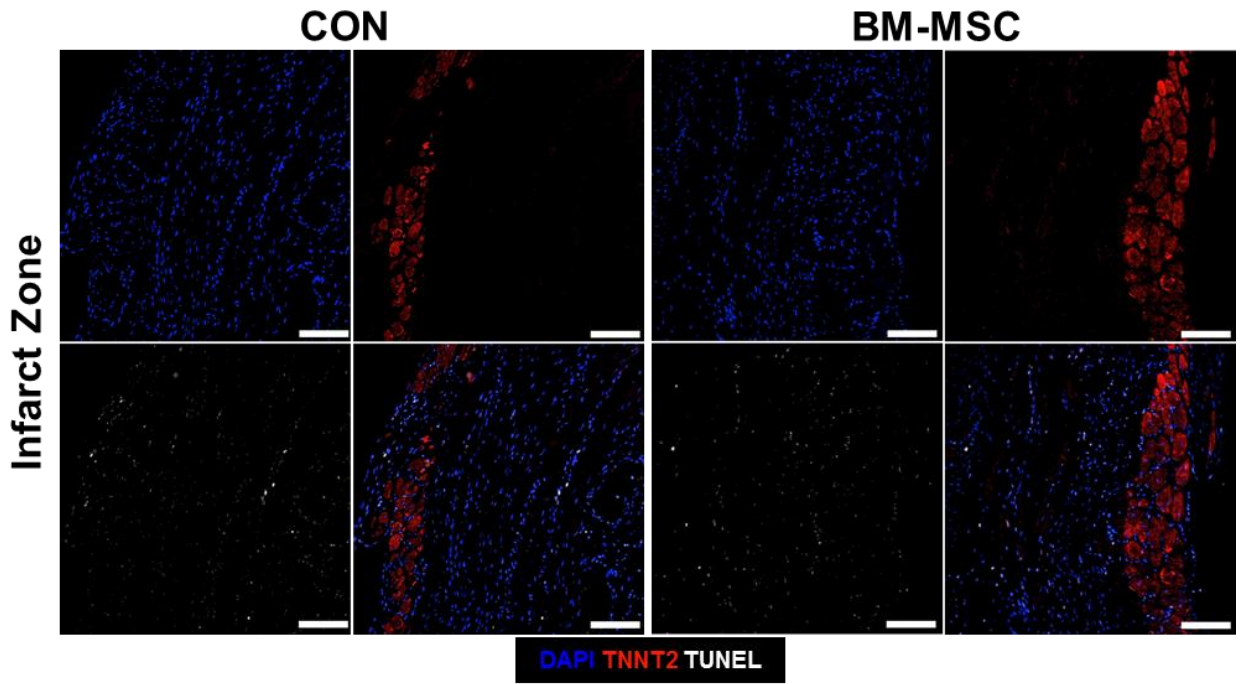

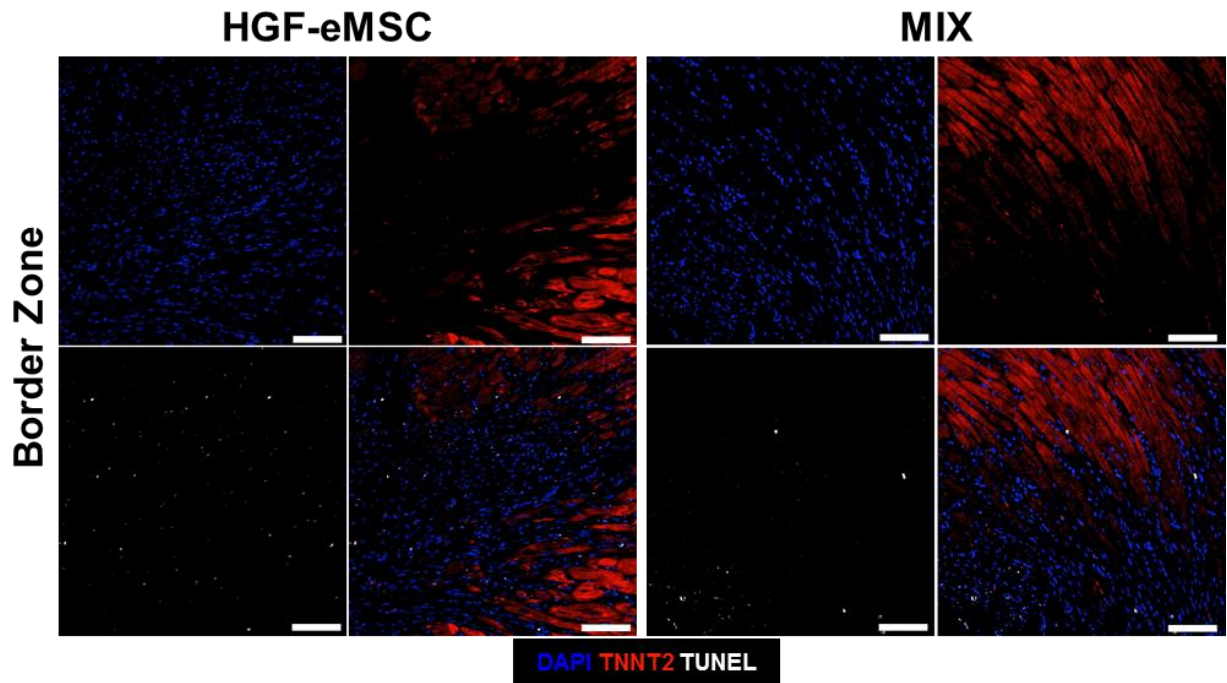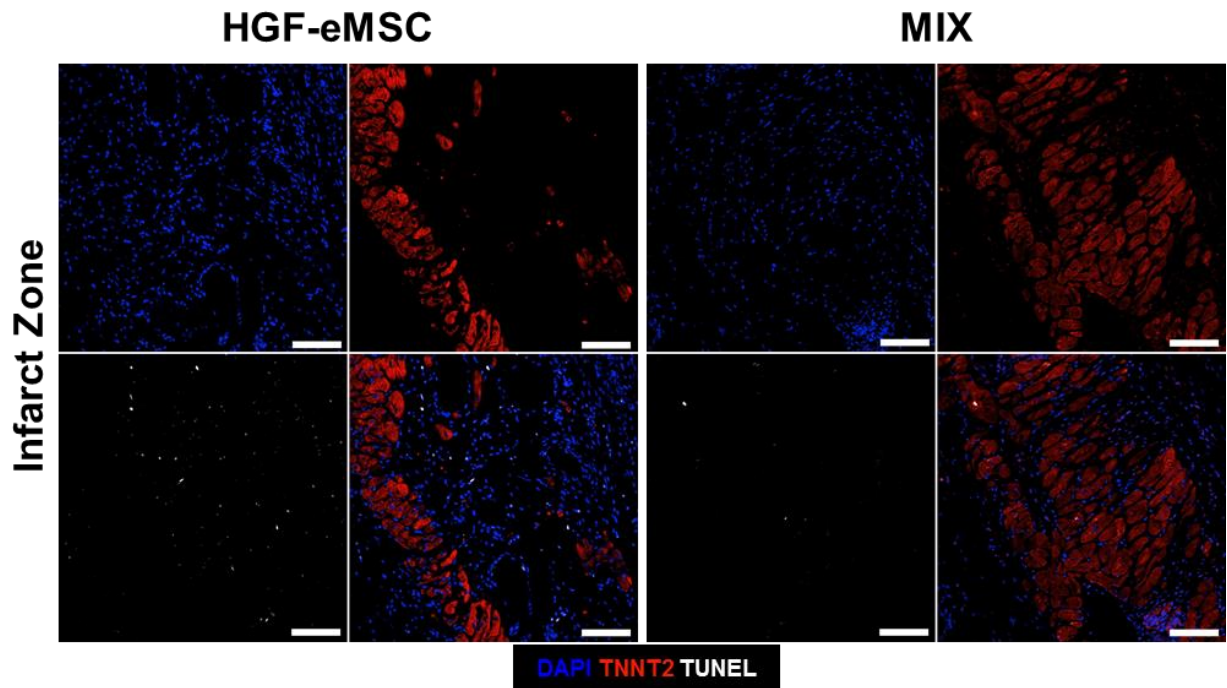

**Fig. S8. Representative immunofluorescence staining images with cardiac-specific marker proteins.** TNNT2 (red), TUNEL signal (grey), and DAPI for nucleus (blue) on cardiac tissues harvested at 8 weeks after MI. Scale bars: 50 $\mu$ m.

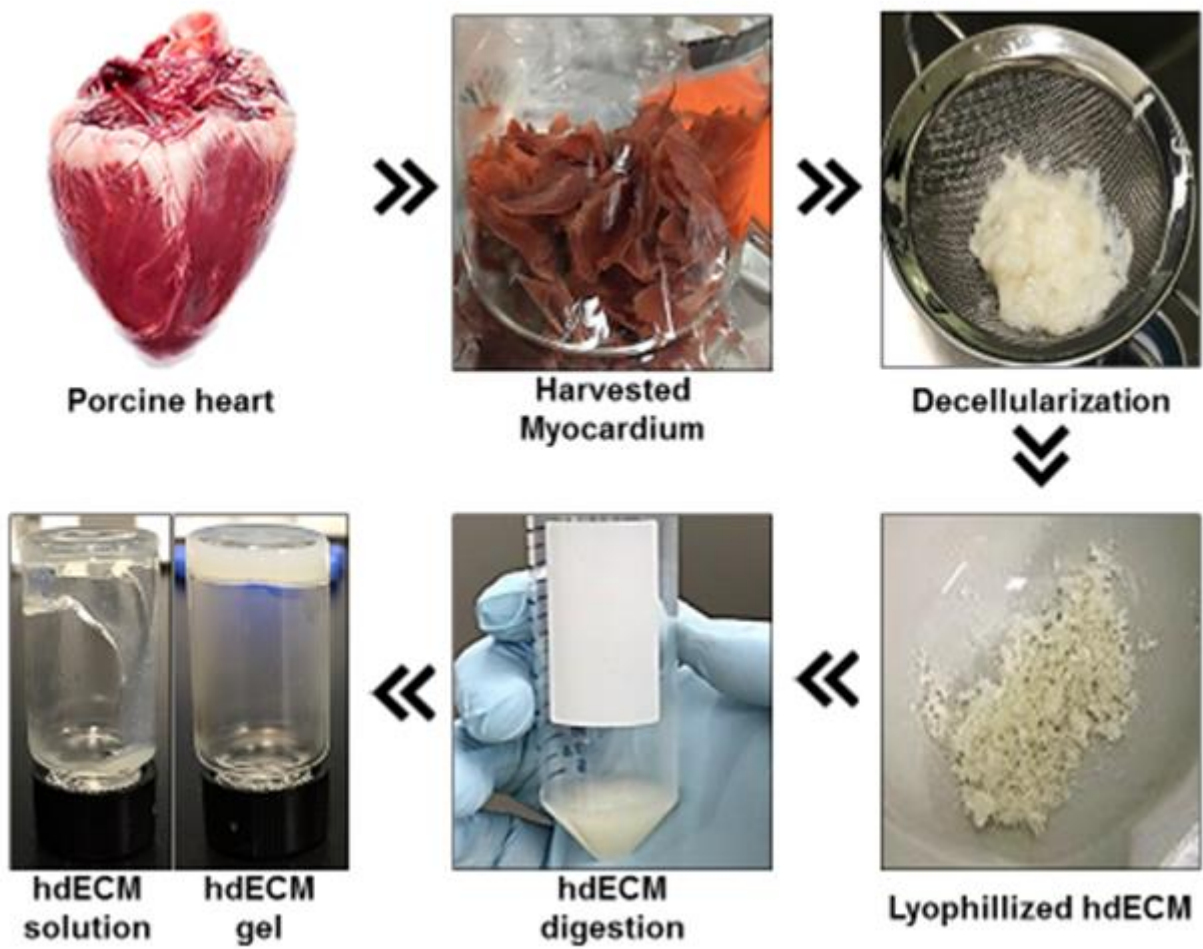

**Fig. S9. Schematic illustration demonstrating the procedures for generating decellularized pig hdECM.** Photo credit: Sanskrita Das, Pohang University of Science and Technology.

**Table S1. Primer sequences used for qRT-PCR analysis.**

| <b>Gene</b>           | <b>Primers</b>        |                         |
|-----------------------|-----------------------|-------------------------|
|                       | <b>Forward</b>        | <b>Reverse</b>          |
| <b>GAPDH</b>          | AGTGCCAGCCTCGTCTCATA  | GTAACCAGGCGTCCGATACG    |
| <b>VEGF</b>           | ACGAAAGCGCAAGAAATCCC  | CTCCAGGGCATTAGACAGCA    |
| <b>HGF</b>            | CGACAGTGTTCCCTTCTCG   | ATTGAGAACCTGTTTGCGTTTCT |
| <b>FGF</b>            | AGAAGAGCGACCCTCACATCA | CGGTTAGCACACACTCCTTTG   |
| <b>IGF</b>            | AGTTGGTGGATGCTCTCCAGT | CACTCATCCACGATTCCTGTC   |
| <b>Angiopoietin-1</b> | CTCGCTGCCATTCTGACTCAC | GACAGTTGCCATCGTGTTCTG   |
